# Supplementary material for: Biological production and simulated moving bed purification of streptothricin F from food waste digestate
Source: Royal Society of Chemistry journal article supplement (doi:10.1039/d4gc04026k), 2024-01-01
Supplement: d4gc04026k1.pdf [file d4gc04026k1.pdf]

## Supporting Information

### Streptothricin F biological production and simulated moving bed purification from food waste digestate

Xiaofang Zhou,<sup>a</sup> Peiyi Li,<sup>b</sup> Yuchen Sun,<sup>b</sup> Zeyang Zhang,<sup>b</sup> Chuanyi Yao,<sup>b</sup> Qingbiao Li<sup>\*b,c</sup> and  
Yuanpeng Wang<sup>\*b</sup>

<sup>a</sup> College of School of environment and ecology, Xiamen University, Xiamen, P. R. China

<sup>b</sup> Department of Chemical and Biochemical Engineering, College of Chemistry and Chemical  
Engineering, Xiamen University, Xiamen, P. R. China

<sup>c</sup> College Food and Biological Engineering, Jimei University, Xiamen, P. R. China

\* Corresponding Author:

Yuanpeng Wang, Department of Chemical and Biochemical Engineering, College of Chemistry  
and Chemical Engineering, Xiamen University, Xiamen 361005 Fujian, China.

Qingbiao Li, Department of Chemical and Biochemical Engineering, College of Chemistry and  
Chemical Engineering, Xiamen University, Xiamen 361005 Fujian, China; College Food and  
Biological Engineering, Jimei University, Xiamen 361021 Fujian, China.

# 1. Experimental Section

## 1.1 Greenhouse gas emissions (GHG)

The primary utility consumption in the process includes purchased low-pressure steam, circulating water, and electricity. Utility usage is converted to standard oil equivalents for calculation. In the life cycle evaluation, process energy is calculated based on standard oil and electricity as detailed in equations (**Formula S1-S4**). The converted values are provided in **Table S8, S10**.

$$GHG_{tCO_2eq} = CO_2 + 25 \times CH_4 + 298 \times N_2O \quad (1)$$

$$IE_{CO_2} = I_{CO_2} \times LHV_{CO_2} \times EC \times 44/12 \quad (2)$$

$$IE_{CH_4} = I_{CH_4} \times LHV_{CH_4} \times EC \quad (3)$$

$$IE_{N_2O} = I_{N_2O} \times LHV_{N_2O} \times EC \quad (4)$$

## 1.2 Non-renewable energy consumption (NEC)

In addition to utility consumption, three non-renewable energy sources (crude oil, raw coal, and natural gas) used in the separation process are analyzed for life cycle non-renewable energy consumption. The method for calculating energy consumption is detailed in equations (**Formula S5-S6**). The results of the non-renewable energy consumption calculations are provided in **Table S11**.

$$NED = NE_{crudeoil} + NE_{crudecoal} + NE_{naturalgas} \quad (5)$$

$$NE_i = \sum (EC \times LHV \times PFCF_i) \quad (6)$$

## 1.3 Eutrophication potential (EP)

The life cycle assessment model for eutrophication potential is calculated using the characterization approach, which integrates input and output data from the life cycle inventory with various environmental impact categories. The quantitative calculation is detailed in equations (**Formula S7**). The results of the eutrophication potential calculations are presented in **Table S9, S12**.

$$EI_j = \sum_i EF_{i,j} \times E_i \quad (7)$$

## 2. Supplementary Figures and Tables

**Figure S1** The Structure of Streptothricin F ( $C_{19}H_{34}O_8N_8$ , 502 MV).

**Figure S2** The concentration of Streptothricin F in the supernatant at different adsorption times.

**Figure S3** The liquid chromatogram of Streptothricin F during food waste digestate biological fermentation and crude extraction (Retention time is 13.29 min).

**Figure S4** The liquid chromatogram of Streptothricin F standard and crude extract were analyzed in a simulated moving bed with C18 semi-preparative columns.

**Figure S5** The total ion flow spectrum of Streptothricin F standard and crude extract by LC-MS (Retention time is 17.85 min).

**Figure S6** The liquid chromatogram of crude extract was analyzed using four C18 semi-preparative columns.

**Figure S7** The total ion flow of extract E and extract R after the simulated moving bed separation and recrystallization using the C18 analysis column.

**Figure S8** The Mass spectrum of extract E were examined after recrystallization.

**Table S1** The ingredients of Gause no. 1 medium.

**Table S2** The composition of food waste digestate.

**Table S3** The C/N/P changes after pre-treatment of food waste digestate.

**Table S4** The comparison of different pretreatment methods for food waste digestate.

**Table S5** The correlation analysis of Streptothricin F concentration in food waste digestate after fermentation under different treatments.

**Table S6** The retention time of thiourea.

**Table S7** The operating parameters of the simulated moving bed at different operating points.

**Table S8** Converted value of utility usage.

**Table S9** Environmental impact indicators and characterization factors.

**Table S10** Greenhouse gas emission ( $tCO_2$  eq/ $m^3$  food waste digestate).

**Table S11** List of renewable energy consumption ( $MJ$  eq/ $m^3$  food waste digestate).

**Table S12** List of eutrophication potential ( $KgSO_2$  eq/kg food waste digestate).

**Table S13** Life Cycle Emission Inventory Data.

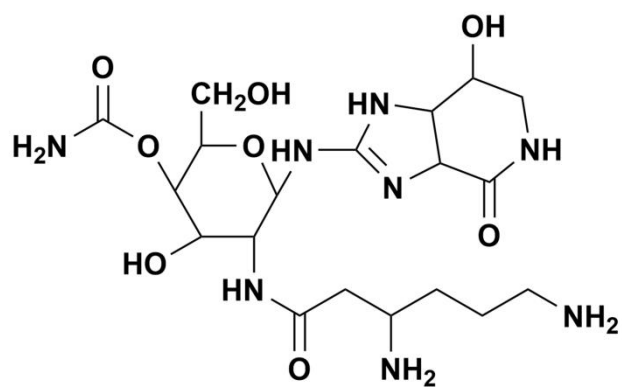

**Figure S1** The Structure of Streptothricin F (C<sub>19</sub>H<sub>34</sub>O<sub>8</sub>N<sub>8</sub>, 502 MV).

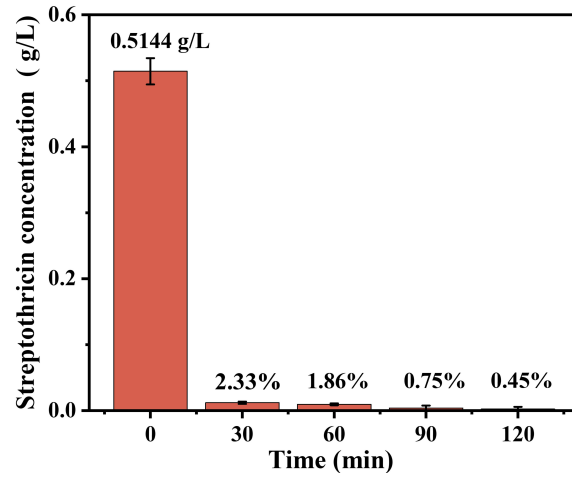

**Figure S2** The concentration of Streptothricin F in the supernatant at different adsorption times.

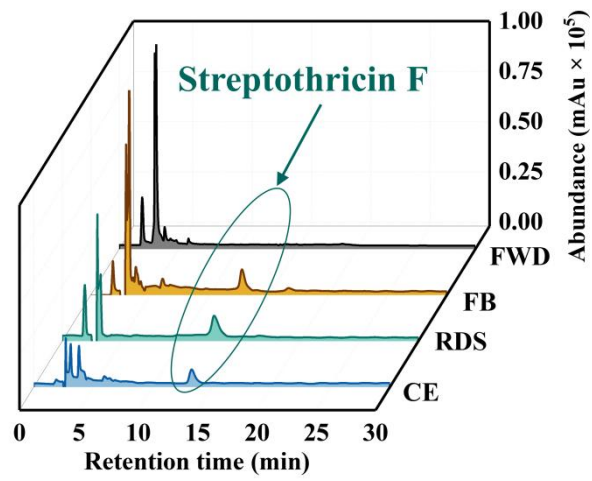

**Figure S3** The liquid chromatogram of Streptothricin F during food waste digestate biological fermentation and crude extraction (Retention time is 13.29 min).

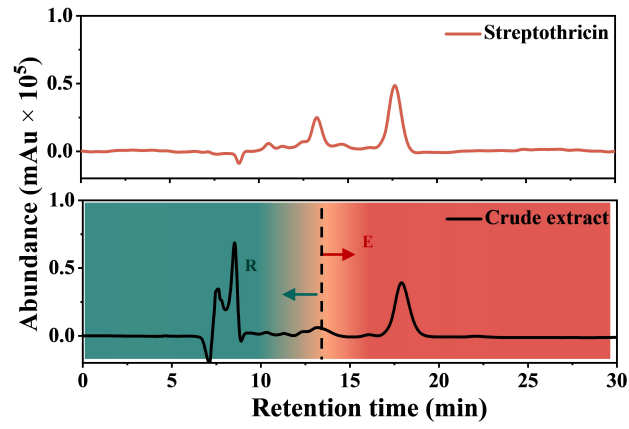

**Figure S4** The liquid chromatogram of Streptothricin F standard and crude extract were analyzed in a simulated moving bed with C18 semi-preparative columns.

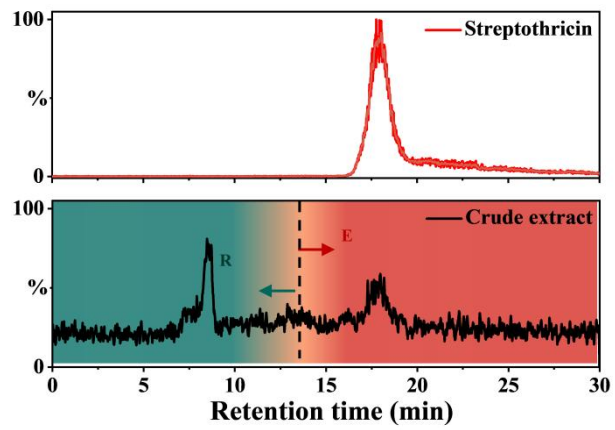

**Figure S5** The total ion flow spectrum of Streptothricin F standard and crude extract by LC-MS (Retention time is 17.85 min).



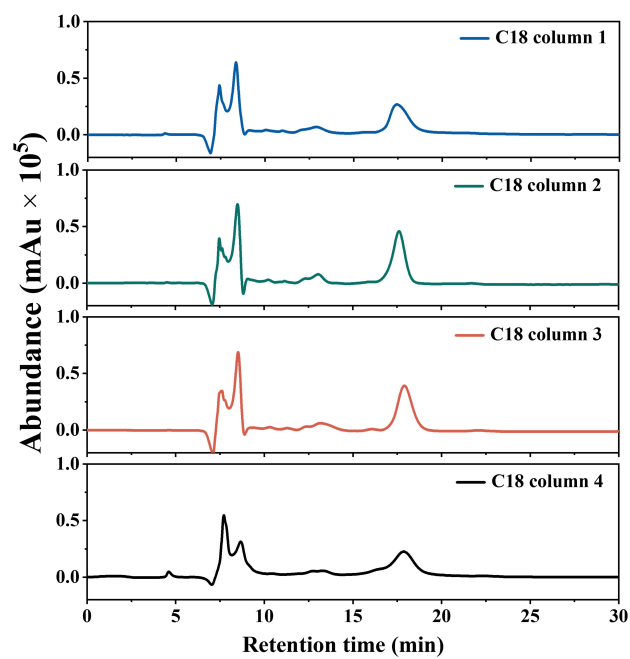

**Figure S6** The liquid chromatogram of crude extract was analyzed using four C18 semi-preparative columns.

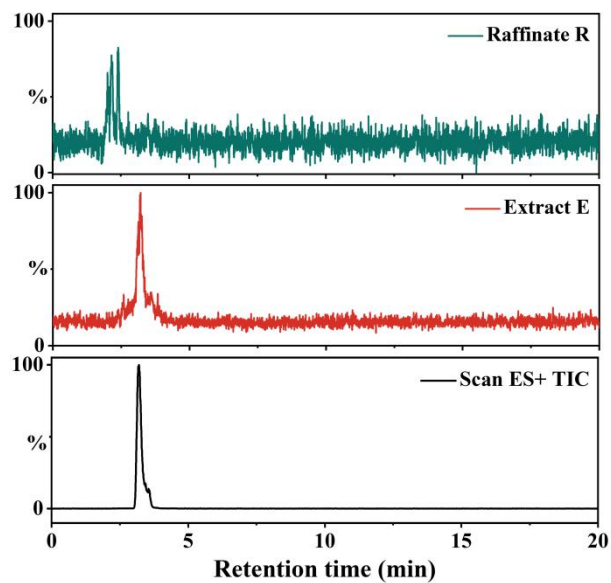

**Figure S7** The total ion flow of extract E and extract R after the simulated moving bed separation and recrystallization using the C18 analysis column.

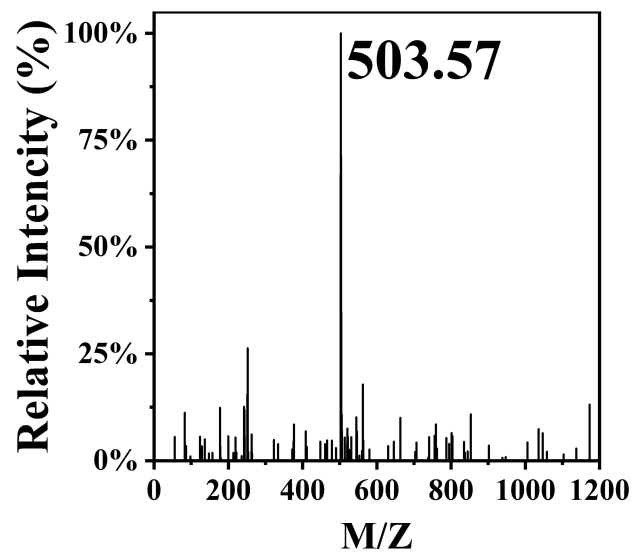

**Figure S8** The Mass spectrum of extract E were examined after recrystallization.

**Table S1** The ingredients of Gause no. 1 medium.

| Ingredient                            | Medium  |
|---------------------------------------|---------|
|                                       | /L      |
| Soluble starch                        | 20.0 g  |
| KNO <sub>3</sub>                      | 1.0 g   |
| NaCl                                  | 0.5 g   |
| K <sub>2</sub> HPO <sub>4</sub>       | 0.5 g   |
| MgSO <sub>4</sub> ·7 H <sub>2</sub> O | 0.5 g   |
| FeSO <sub>4</sub> ·7 H <sub>2</sub> O | 10.0 mg |
| pH                                    | 7.4-7.6 |

**Table S2** The composition of food waste digestate.

| Operating parameter                    | Parameter value |
|----------------------------------------|-----------------|
| pH                                     | 8.42±0.11       |
| EC (ms/cm)                             | 400 ± 37        |
| TOC (mg/L)                             | 5608 ± 48       |
| COD (mg/L)                             | 15860 ± 443     |
| TN (mg/L)                              | 3158 ± 37       |
| TP (mg/L)                              | 396 ± 27        |
| NH <sub>4</sub> <sup>+</sup> -N (mg/L) | 2743 ± 31       |
| TS (%)                                 | 1.78 ± 0.21     |
| VS (%)                                 | 0.74 ± 0.14     |

**Table S3** The C/N/P changes after pre-treatment of food waste digestate.

|        | TOC<br>(mg/L) | COD<br>(mg/L) | TN<br>(mg/L) | NH <sub>4</sub> <sup>+</sup> -N<br>(mg/L) | TP<br>(mg/L) |
|--------|---------------|---------------|--------------|-------------------------------------------|--------------|
| FWD    | 5608 ± 48     | 15860 ± 443   | 3158 ± 37    | 2743 ± 31                                 | 396 ± 27     |
| FWD-MD | 6421 ± 56     | 16155 ± 419   | 650 ± 17     | 228 ± 22                                  | 393 ± 34     |

**Table S4** The comparison of different pretreatment methods for food waste digestate.

|                             | COD<br>(mg/L) | NH <sub>4</sub> <sup>+</sup> -N<br>(mg/L) | TP<br>(mg/L) | comparison                                              |
|-----------------------------|---------------|-------------------------------------------|--------------|---------------------------------------------------------|
| Food waste digestate        | 15860 ± 443   | 2743 ± 31                                 | 396 ± 27     | ——                                                      |
| Membrane distillation       | 16155 ± 419   | 228 ± 22                                  | 393 ± 34     | High removal rate, high removal rate, simple to operate |
| Struvite precipitation      | 7598±189      | 1419±73                                   | 14±7         | Adding chemical reagents, secondary pollution           |
| Activated carbon adsorption | 15139±477     | 2416±83                                   | 410±21       | Low removal effect, generate solid waste                |
| Reverse osmosis             | 5594±121      | 242±11                                    | 54±11        | Nonselectivity, complicated operation                   |

**Table S5** The correlation analysis of Streptothricin F concentration in food waste digestate after fermentation under different treatments.

| Index  | FWD | FWD-MD | G-25%  | G-50%   | G-75%   | G-100%  | S-25%   | S-50%   | S-75%   | S-100%  |
|--------|-----|--------|--------|---------|---------|---------|---------|---------|---------|---------|
| FWD    | 1   | 0.0498 | 0.0009 | <0.0001 | <0.0001 | <0.0001 | 0.0001  | <0.0001 | <0.0001 | 0.9078  |
| FWD-MD | *   | 1      | 0.0734 | <0.0001 | <0.0001 | <0.0001 | 0.0128  | <0.0001 | <0.0001 | 0.9996  |
| G-25%  | **  | ns     | 1      | <0.0001 | 0.0011  | <0.0001 | 0.9967  | <0.0001 | <0.0001 | 0.0193  |
| G-50%  | **  | **     | **     | 1       | <0.0001 | 0.0011  | <0.0001 | 0.6977  | 0.0011  | <0.0001 |
| G-75%  | **  | **     | **     | **      | 1       | 0.4989  | 0.0067  | 0.0005  | 0.4905  | <0.0001 |
| G-100% | **  | **     | **     | **      | ns      | 1       | <0.0001 | 0.0587  | >0.9999 | <0.0001 |
| S-25%  | **  | *      | ns     | **      | **      | **      | 1       | <0.0001 | <0.0001 | 0.0031  |
| S-50%  | **  | **     | **     | ns      | **      | ns      | **      | 1       | 0.0604  | <0.0001 |
| S-75%  | **  | **     | **     | **      | ns      | **      | **      | ns      | 1       | <0.0001 |
| S-100% | ns  | ns     | *      | **      | **      | **      | **      | **      | **      | 1       |

An asterisk (\*) represents a significant difference of  $P < 0.05$ , while two asterisks (\*\*) represent a significant difference of  $P < 0.01$ .



---

**Table S6** The retention time of thiourea.

| Flow rates (mL/min)  | Retention time (min) |           |           |           |
|----------------------|----------------------|-----------|-----------|-----------|
|                      | Column #1            | Column #2 | Column #3 | Column #4 |
| 0.5                  | 15.901               | 15.633    | 15.681    | 15.71     |
| 1                    | 7.884                | 7.826     | 7.765     | 7.776     |
| 2                    | 4.053                | 4.146     | 4.028     | 4.031     |
| 3                    | 2.793                | 2.803     | 2.778     | 2.783     |
| 4                    | 2.087                | 2.078     | 2.077     | 2.076     |
| 5                    | 1.682                | 1.66      | 1.65      | 1.656     |
| R2                   | 0.99982              | 0.99988   | 0.99983   | 0.99983   |
| The overall porosity | 0.70296              | 0.69943   | 0.6949    | 0.6961    |
| The bed porosity     | 0.35809              | 0.35164   | 0.35173   | 0.35187   |

---

---

**Table S7** The operating parameters of the simulated moving bed at different operating points.

| Operating parameter     | P1         | P2         | P3         | P4         | P5         |
|-------------------------|------------|------------|------------|------------|------------|
| m II, m III             | 1.62, 1.84 | 1.42, 1.61 | 1.22, 1.38 | 1.01, 1.15 | 0.81, 0.92 |
| T <sub>S</sub> (min)    | 140        | 140        | 140        | 140        | 140        |
| Q <sub>D</sub> (mL/min) | 1.000      | 1.000      | 1.000      | 1.000      | 1.000      |
| Q <sub>E</sub> (mL/min) | 0.528      | 0.572      | 0.616      | 0.661      | 0.705      |
| Q <sub>F</sub> (mL/min) | 0.048      | 0.042      | 0.036      | 0.030      | 0.024      |
| Q <sub>R</sub> (mL/min) | 0.519      | 0.469      | 0.419      | 0.369      | 0.319      |
| Recovery rate (%)       | 81.27%     | 96.78%     | 98.64%     | 99.32%     | 99.12%     |
| Purity (%)              | 99.05%     | 97.47%     | 95.26%     | 92.22%     | 78.07%     |

---

---

**Table S8** Converted value of utility usage.

---

| Utility usage<br>(m <sup>3</sup> /food waste digestate): | Aspen | Conversion value | Energy value<br>(kgEO/m <sup>3</sup> food waste digestate) |
|----------------------------------------------------------|-------|------------------|------------------------------------------------------------|
| Water                                                    | 0.396 | 55               | 21.78                                                      |
| Electricity (kwh)                                        | 0.36  | 0.22             | 0.0792                                                     |

---

---

**Table S9** Environmental impact indicators and characterization factors.

---

| Environmental impact indicators                | Pollutants                    | Characterization factor |
|------------------------------------------------|-------------------------------|-------------------------|
| (EP)<br>Kg PO <sub>4</sub> <sup>3-</sup> eq/kg | COD                           | 0.02                    |
|                                                | NO <sub>3</sub> <sup>-</sup>  | 0.42                    |
|                                                | PO <sub>4</sub> <sup>3-</sup> | 1.00                    |
|                                                | NH <sub>3</sub>               | 0.35                    |
|                                                | NH <sub>4</sub> <sup>+</sup>  | 0.35                    |
|                                                | NO <sub>x</sub>               | 0.13                    |
|                                                | N <sub>2</sub> O              | 0.27                    |

---





---

**Table S12** List of eutrophication potential (KgSO<sub>2</sub> eq/kg food waste digestate).

---

|                             | COD               | characterization | (EP)                                   |
|-----------------------------|-------------------|------------------|----------------------------------------|
|                             | kg/m <sup>3</sup> | factor           | Kg PO <sub>4</sub> <sup>3-</sup> eq/kg |
| Food waste digestate        | 15.228            | 0.022            | 0.335016                               |
| Biological Fermentation     | 1.372             | 0.022            | 0.030184                               |
| Crude extraction            | 0.364             | 0.022            | 0.008008                               |
| Separation and Purification | 1.16              | 0.022            | 0.02552                                |
| Total                       |                   |                  | 0.398728                               |

---

---

**Table S13** Life Cycle Emission Inventory Data.

| Operating parameter                        | Food waste<br>digestate | Biological<br>Fermentation | Crude<br>extraction | Separation and<br>Purification |
|--------------------------------------------|-------------------------|----------------------------|---------------------|--------------------------------|
| COD (mg/L)                                 | 18457                   | 3229                       | 1195                | 333                            |
| EP (KgPO <sub>4</sub> <sup>3-</sup> eq/kg) | –                       | 0.3350                     | 0.0380              | 0.0260                         |
| GHG (tCO <sub>2</sub> eq/m <sup>3</sup> )  | –                       | –                          | 0.0038              | 0.0860                         |
| NEC (MJ eq/m <sup>3</sup> )                | –                       | –                          | 0.3600              | 0.3900                         |

The primary sources of emissions and energy consumption include: ① Raw Material Acquisition: This refers to the energy and emissions associated with the extraction and processing of raw materials used in fermentation and purification; ② Waste Management: This pertains to emissions generated during the treatment and disposal of waste products.
